# Supplementary material for: Development of a prediction system for tail-anchored proteins
Source: PubMed Central journal article supplement (PMC5025589; doi:10.1186/s12859-016-1202-7), 2016-09-15
Supplement: 12859_2016_1202_MOESM1_ESM.pdf [file 12859_2016_1202_MOESM1_ESM.pdf]

**Table S2. Initial conditional probability in the TA model**

| Amino acid | Output probability |            |            |                 |
|------------|--------------------|------------|------------|-----------------|
|            | Tail region        | TMD region | Cap region | Globular region |
| A          | 0.0273             | 0.1333     | 0.01       | 0.05            |
| C          | 0.0778             | 0.0143     | 0.01       | 0.05            |
| D          | 0.0778             | 0.0143     | 0.01       | 0.05            |
| E          | 0.0778             | 0.0143     | 0.01       | 0.05            |
| F          | 0.0273             | 0.1333     | 0.01       | 0.05            |
| G          | 0.0273             | 0.1333     | 0.01       | 0.05            |
| H          | 0.0778             | 0.0143     | 0.01       | 0.05            |
| I          | 0.0273             | 0.1333     | 0.01       | 0.05            |
| K          | 0.0778             | 0.0143     | 0.41       | 0.05            |
| L          | 0.0273             | 0.1333     | 0.01       | 0.05            |
| M          | 0.0273             | 0.0143     | 0.01       | 0.05            |
| N          | 0.0778             | 0.0143     | 0.01       | 0.05            |
| P          | 0.0273             | 0.0143     | 0.01       | 0.05            |
| Q          | 0.0778             | 0.0143     | 0.01       | 0.05            |
| R          | 0.0778             | 0.0143     | 0.41       | 0.05            |
| S          | 0.0778             | 0.0143     | 0.01       | 0.05            |
| T          | 0.0778             | 0.0143     | 0.01       | 0.05            |
| V          | 0.0273             | 0.1333     | 0.01       | 0.05            |
| W          | 0.0273             | 0.0143     | 0.01       | 0.05            |
| Y          | 0.0778             | 0.0143     | 0.01       | 0.05            |

Output probabilities were set such that hydrophilic, hydrophobic, and basic residues were more likely to occur in the tail region, TMD region, and cap region, respectively.
