# Supplementary material for: Development of a prediction system for tail-anchored proteins
Source: PubMed Central journal article supplement (PMC5025589; doi:10.1186/s12859-016-1202-7), 2016-09-15
Supplement: 12859_2016_1202_MOESM5_ESM.pdf [file 12859_2016_1202_MOESM5_ESM.pdf]

**Table S5. Unsuccessfully predicted sequences.**

| <b>SP</b>    | <b>MP</b>    | <b>NO</b>    | <b>total</b> | <b>decoding</b> | <b>all</b>   |
|--------------|--------------|--------------|--------------|-----------------|--------------|
| AOFB_HUMAN   | CSM4_YEAST   | CSM4_YEAST   | CSM4_YEAST   | GEX2_ARATH      | SEC20_YEAST  |
| GEX2_ARATH   | GEX2_ARATH   | GEX2_ARATH   | CYB5_HUMAN   | MAVS_HUMAN      | GEX2_ARATH   |
| MAVS_HUMAN   | MAVS_HUMAN   | MAVS_HUMAN   | GEX2_ARATH   | MTX1_HUMAN      | TOM7_HUMAN   |
| MIRO1_HUMAN  | MTX1_HUMAN   | MTX1_HUMAN   | MAVS_HUMAN   | O22825_ARATH    | YD012_YEAST  |
| MIRO2_HUMAN  | O22825_ARATH | O22825_ARATH | MIRO2_HUMAN  | PEX15_YEAST     | PGC1_YEAST   |
| MTX1_HUMAN   | O80952_ARATH | O80952_ARATH | MTX1_HUMAN   | PGC1_YEAST      | MAVS_HUMAN   |
| NDB3B_ARATH  | PGC1_YEAST   | PGC1_YEAST   | NDB3B_ARATH  | Q9FNB2_ARATH    | MTX1_HUMAN   |
| O22825_ARATH | Q93YW7_ARATH | Q93YW7_ARATH | O22825_ARATH | Q9M1X3_ARATH    | TOM7_YEAST   |
| PGC1_YEAST   | Q9FNB2_ARATH | Q9FNB2_ARATH | O80952_ARATH | SEC20_YEAST     | O22825_ARATH |
| Q93YW7_ARATH | Q9SKK2_ARATH | Q9SKK2_ARATH | PGC1_YEAST   | TLG2_YEAST      | Q9FNB2_ARATH |
| Q9C7H2_ARATH | SEC20_YEAST  | SEC20_YEAST  | Q93YW7_ARATH | TOM22_YEAST     |              |
| Q9FNB2_ARATH | TO221_ARATH  | TO221_ARATH  | Q9FNB2_ARATH | TOM5_ARATH      |              |
| Q9SKK2_ARATH | TOM6_YEAST   | TOM6_YEAST   | Q9SKK2_ARATH | TOM6_YEAST      |              |
| SEC20_YEAST  | TOM7_HUMAN   | TOM7_HUMAN   | Q9SLI4_ARATH | TOM7_HUMAN      |              |
| TLG2_YEAST   | TOM7_YEAST   | TOM7_YEAST   | SEC20_YEAST  | TOM7_YEAST      |              |
| TO221_ARATH  | YD012_YEAST  | YBM6_YEAST   | TLG2_YEAST   | YD012_YEAST     |              |
| TOM7_HUMAN   |              | YD012_YEAST  | TO221_ARATH  |                 |              |
| TOM7_YEAST   |              |              | TOM6_YEAST   |                 |              |
| YBM6_YEAST   |              |              | TOM7_HUMAN   |                 |              |
| YD012_YEAST  |              |              | TOM7_YEAST   |                 |              |
|              |              |              | YBM6_YEAST   |                 |              |
|              |              |              | YD012_YEAST  |                 |              |

Each column corresponds to an evaluation method. The “SP”, “MP”, “NO”, and “total” columns list sequences with failed likelihood score-based predictions in the SP, MP, NO, and entire negative sets, respectively. Sequences that did not generate proper topology are indicated in the “decoding” column. Sequences that failed in all methods are indicated in the all column.
