# Supplementary material for: Development of a prediction system for tail-anchored proteins
Source: PubMed Central journal article supplement (PMC5025589; doi:10.1186/s12859-016-1202-7), 2016-09-15
Supplement: 12859_2016_1202_MOESM6_ESM.pdf [file 12859_2016_1202_MOESM6_ESM.pdf]

**Table S3. Initial conditions for the SP model.**

| Amino acid | Output probability |         |         |            |                 |         |
|------------|--------------------|---------|---------|------------|-----------------|---------|
|            | Signal peptide     |         |         | Cap region | Globular region | TMD     |
|            | 1-6                | 7-15    | 16-40   |            |                 |         |
| A          | 0.02941            | 0.06667 | 0.06122 | 0.02941    | 0.05            | 0.08753 |
| C          | 0.02941            | 0.02222 | 0.02041 | 0.02941    | 0.05            | 0.04376 |
| D          | 0.02941            | 0.02222 | 0.08163 | 0.02941    | 0.05            | 0.00656 |
| E          | 0.02941            | 0.02222 | 0.14286 | 0.02941    | 0.05            | 0.00656 |
| F          | 0.02941            | 0.02222 | 0.08163 | 0.02941    | 0.05            | 0.13129 |
| G          | 0.02941            | 0.11111 | 0.02041 | 0.02941    | 0.05            | 0.08753 |
| H          | 0.02941            | 0.02222 | 0.02041 | 0.02941    | 0.05            | 0.02188 |
| I          | 0.02941            | 0.11111 | 0.02041 | 0.02941    | 0.05            | 0.13129 |
| K          | 0.02941            | 0.02222 | 0.08163 | 0.23529    | 0.05            | 0.00656 |
| L          | 0.08824            | 0.17778 | 0.02041 | 0.02941    | 0.05            | 0.13129 |
| M          | 0.14706            | 0.02222 | 0.02041 | 0.02941    | 0.05            | 0.06565 |
| N          | 0.02941            | 0.02222 | 0.08163 | 0.02941    | 0.05            | 0.01094 |
| P          | 0.02941            | 0.02222 | 0.02041 | 0.02941    | 0.05            | 0.02188 |
| Q          | 0.02941            | 0.02222 | 0.08163 | 0.02941    | 0.05            | 0.01094 |
| R          | 0.02941            | 0.02222 | 0.02041 | 0.23529    | 0.05            | 0.00656 |
| S          | 0.14706            | 0.02222 | 0.02041 | 0.02941    | 0.05            | 0.01094 |
| T          | 0.02941            | 0.02222 | 0.08163 | 0.02941    | 0.05            | 0.01094 |
| V          | 0.14706            | 0.15556 | 0.08163 | 0.02941    | 0.05            | 0.13129 |
| W          | 0.02941            | 0.06667 | 0.02041 | 0.02941    | 0.05            | 0.06565 |
| Y          | 0.02941            | 0.02222 | 0.02041 | 0.02941    | 0.05            | 0.01094 |

The SP region is further divided into 3 sections, corresponding to areas from the starting point to the 6th residue, from the 7th to 15th residue, and from the 16th to 40th residue.
