# Supplementary material for: Development of a prediction system for tail-anchored proteins
Source: PubMed Central journal article supplement (PMC5025589; doi:10.1186/s12859-016-1202-7), 2016-09-15
Supplement: 12859_2016_1202_MOESM7_ESM.pdf [file 12859_2016_1202_MOESM7_ESM.pdf]

**Table S4. Initial conditions for the MP model.**

| Amino acid | Output probability |         |         |            |                 |         |         |
|------------|--------------------|---------|---------|------------|-----------------|---------|---------|
|            | Signal peptide     |         |         | Cap region | Globular region | TMD     | Loop    |
|            | 1-6                | 7-15    | 16-40   |            |                 |         |         |
| A          | 0.02941            | 0.06667 | 0.06122 | 0.02941    | 0.05405         | 0.08753 | 0.02381 |
| C          | 0.02941            | 0.02222 | 0.02041 | 0.02941    | 0.05405         | 0.04376 | 0.02381 |
| D          | 0.02941            | 0.02222 | 0.08163 | 0.02941    | 0.05405         | 0.00656 | 0.11905 |
| E          | 0.02941            | 0.02222 | 0.14286 | 0.02941    | 0.05405         | 0.00656 | 0.11905 |
| F          | 0.02941            | 0.02222 | 0.08163 | 0.02941    | 0.05405         | 0.13129 | 0.02381 |
| G          | 0.02941            | 0.11111 | 0.02041 | 0.02941    | 0.05405         | 0.08753 | 0.02381 |
| H          | 0.02941            | 0.02222 | 0.02041 | 0.02941    | 0.05405         | 0.02188 | 0.02381 |
| I          | 0.02941            | 0.11111 | 0.02041 | 0.02941    | 0.02703         | 0.13129 | 0.02381 |
| K          | 0.02941            | 0.02222 | 0.08163 | 0.23529    | 0.05405         | 0.00656 | 0.02381 |
| L          | 0.08824            | 0.17778 | 0.02041 | 0.02941    | 0.02703         | 0.13129 | 0.02381 |
| M          | 0.14706            | 0.02222 | 0.02041 | 0.02941    | 0.05405         | 0.06565 | 0.02381 |
| N          | 0.02941            | 0.02222 | 0.08163 | 0.02941    | 0.05405         | 0.01094 | 0.11905 |
| P          | 0.02941            | 0.02222 | 0.02041 | 0.02941    | 0.05405         | 0.02188 | 0.02381 |
| Q          | 0.02941            | 0.02222 | 0.08163 | 0.02941    | 0.05405         | 0.01094 | 0.11905 |
| R          | 0.02941            | 0.02222 | 0.02041 | 0.23529    | 0.05405         | 0.00656 | 0.02381 |
| S          | 0.14706            | 0.02222 | 0.02041 | 0.02941    | 0.05405         | 0.01094 | 0.07143 |
| T          | 0.02941            | 0.02222 | 0.08163 | 0.02941    | 0.05405         | 0.01094 | 0.07143 |
| V          | 0.14706            | 0.15556 | 0.08163 | 0.02941    | 0.02703         | 0.13129 | 0.02381 |
| W          | 0.02941            | 0.06667 | 0.02041 | 0.02941    | 0.05405         | 0.06565 | 0.02381 |
| Y          | 0.02941            | 0.02222 | 0.02041 | 0.02941    | 0.05405         | 0.01094 | 0.07143 |

The initial output probability conditions of the SP region, cap region, and TMD region were identical to those in the SP model. In the globular region, the initial output probabilities for hydrophobic residues frequently observed in TMDs (I, L, and V) were set low. In the loop region, the initial conditions were set such that some hydrophobic residues (I, V, and L) were less likely to occur, whereas some hydrophilic and acidic residues (D, E, N, and Q) were more likely to occur.
